# Supplementary material for: Self-assembled PEG–poly(l-valine) hydrogels as promising 3D cell culture scaffolds
Source: Royal Society of Chemistry journal article supplement (doi:10.1039/c6tb02969h), 2017-01-01
Supplement: c6tb02969h1.pdf [file c6tb02969h1.pdf]

## Supporting information for “Self-assembled PEG-poly(L-valine) hydrogels as promising 3D cell culture scaffolds”

Huijuan Song<sup>1†</sup>, Guang Yang<sup>2†</sup>, Pingsheng Huang<sup>1</sup>, Deling Kong<sup>1\*</sup>, Weiwei Wang<sup>1\*</sup>

<sup>1</sup> Tianjin Key Laboratory of Biomaterial Research, Institute of Biomedical Engineering, Chinese Academy of Medical Sciences and Peking Union Medical College, Tianjin 300192, China

<sup>2</sup> School of Chemical Engineering and Technology, Tianjin University, Tianjin 300072, China

† These authors contributed equally to this work.

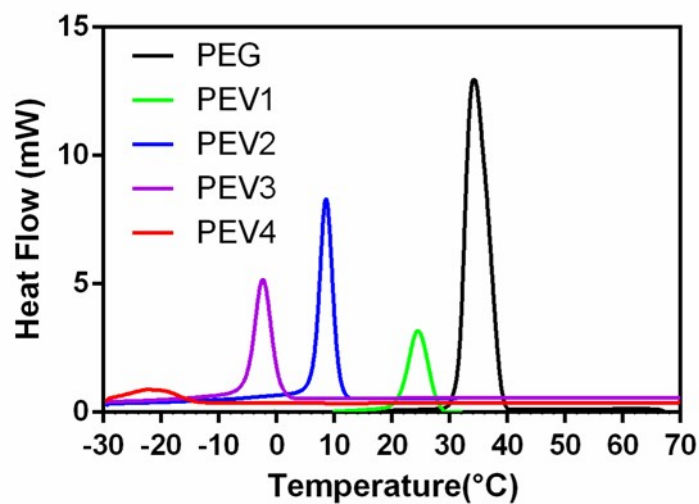

**Fig. S1** DSC curves of PEV copolymers recorded during the cooling stage. The cooling rate was 3 °C/min.

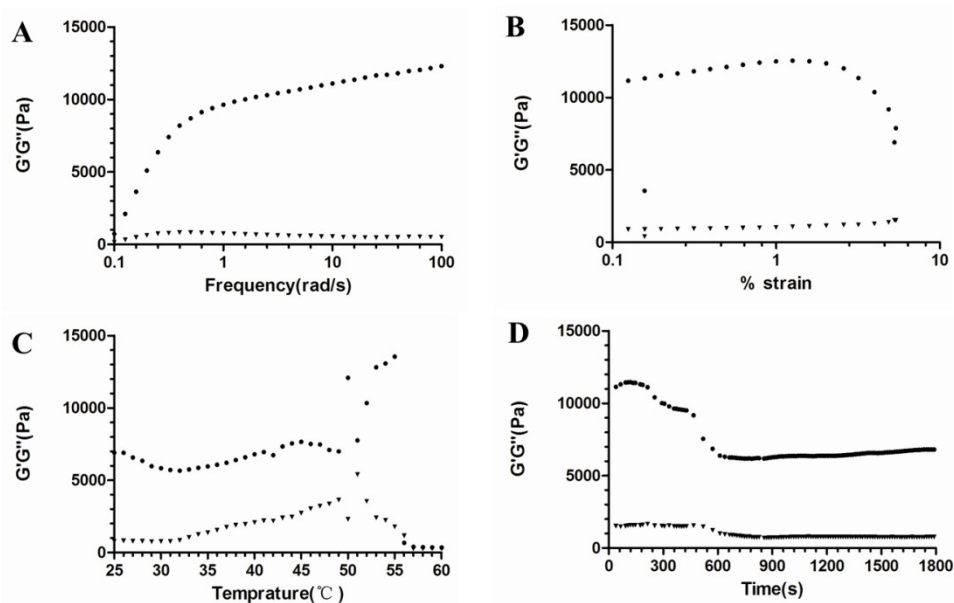

**Fig. S2** The storage modulus ( $G'$ ) and loss modulus ( $G''$ ) change in response to angular frequency (0-100 rad/s, A; shear strain, 1%; temperature, 25 °C), shear strain (0-10%, B; angular frequency, 1 rad/s; temperature, 25 °C), temperature (25-60 °C, C) and culture time (0-30 min, D). The angular frequency and strain were set at 1 rad/s and 1%, respectively.

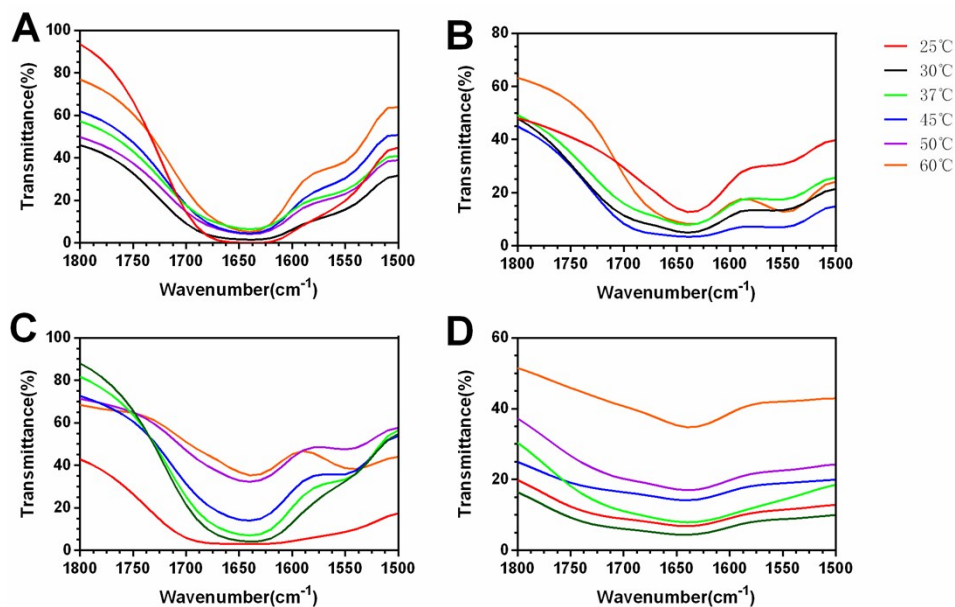

**Fig. S3** FT-IR spectra of PEV hydrogels at a polymer concentration of 200 mg/mL as a function of temperature. (A, PEV-1; B, PEV-2; C, PEV-3; D, PEV-4)

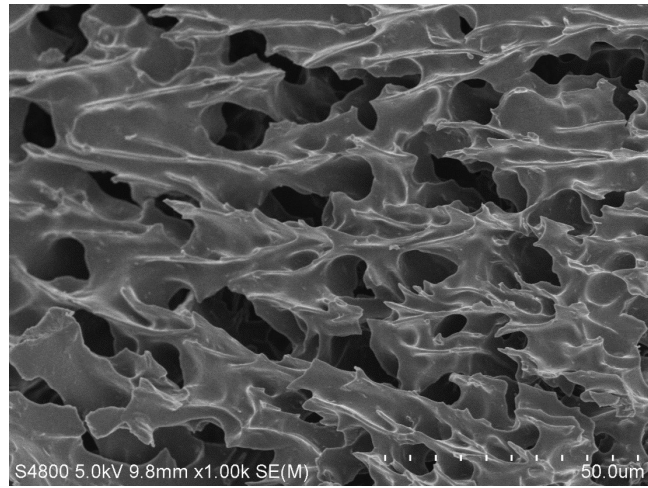

**Fig. S4** The representative SEM image of PEV-3 hydrogel.
